# Supplementary material
Source: Copernicus journal article supplement (doi:10.5194/nhess-26-1795-2026)
Supplement: Supplementary file 1 [file nhess-26-1795-2026-supplement.pdf]

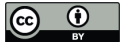

*Supplement of*

## **Prototype citizen and community science app for urban heavy rainfall risk management in the Ahr Valley, Germany**

**Jaqueline Hoffmann et al.**

*Correspondence to:* Peter Fischer-Stabel ([p.fischer-stabel@umwelt-campus.de](mailto:p.fischer-stabel@umwelt-campus.de))

The copyright of individual parts of the supplement might differ from the article licence.

# Questionnaires for evaluating the CCS app

## **Note about the material:**

The questionnaires were distributed to participants before and after testing the app. They were treated anonymously by assigning a code. The questionnaires were distributed in German, as the app was tested in Germany. The following questionnaires were completed as examples by one of the participants. Pages 2–12 show the original German version of the survey. Pages 13–23 show the English translation of the survey.

# Eingangs-Fragebogen zur "Urban Flood Resilience - Smart Tools" Citizen Science App

Herzlich Willkommen zur Umfrage der App-Journey im Rahmen des Forschungsprojektes "Urban Flood Resilience - Smart Tools" (FloReST). Diese Umfrage hilft uns, Ihren aktuellen Wissensstand zum Thema Starkregen- und Hochwassermanagement und Ihre Erwartungen zu verstehen, um die App optimal gestalten zu können.

Um eine Zuordnung Ihrer Antworten von Eingangs-Umfrage (vor der App-Journey) zu Nachgangs-Umfrage (nach der App-Journey) zu gewährleisten, bitten wir Sie ein individuelles Kürzel zu generieren.

Ihre Antworten werden vertraulich behandelt und anonym ausgewertet. Die Umfrage dauert etwa 5-10 Minuten.

Vielen Dank für Ihre Teilnahme!

Generierung des Kürzels:

Letzter Buchstabe Ihres Vornamens (z.B. "A" für Lisa)

Erste Ziffer Ihres Geburtsmonats (z.B. "2" für Februar)

Erster Buchstabe des Vornamens Ihrer Mutter (z.B. "B" für Bettina)

Letzter Buchstabe Ihres Geburtsortes (z.B. "R" für Trier)

--> "A2BR"

zusätzlich für Projektmitglieder:

Ergänzung um "- P"

--> "A2BR - P"

Kürzel \*

X4PH

**Demografische Merkmale**

Alter \*

⌵ Dropdown

21-28

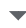

Geschlecht \*

⌵ Dropdown

männlich

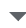

Wohnsituation \*

zur Miete

Eigentumswohnung

Hausbesitzer

Sonstiges: .....

Wohnort (Postleitzahl) \*

55768 .....

### Bildungshintergrund \*

- Kein Schulabschluss
- Berufsreife (Haupt-/Volksschulabschluss)
- Mittlere Reife (Realschulabschluss)
- Fachhochschulreife/Hochschulreife
- Abgeschlossene Berufsausbildung
- Diplom
- Bachelor
- Master
- Promotion
- Staatsexamen
- Sonstiges: .....

Sind Sie in einem Verein oder einer Organisation aktiv, die sich mit Umweltschutz oder Katastrophenschutz beschäftigt? \*

- Ja
- Nein

### Aktueller Kenntnisstand

Haben Sie in der Vergangenheit Erfahrungen mit Hochwasser gemacht? \*

- Ja, persönlich betroffen
- Ja, in der Nähe betroffen
- Nein

Wie informieren Sie sich über lokale Wetterlagen und Starkregengefahren? \*  
(Mehrfachauswahl möglich)

- Apps (z.B. Wetter, Katastrophenschutz, Zeitung)
- Fernsehen
- Radio
- Printmedien
- Webseiten im Internet
- Gar nicht
- Sonstiges: .....

Welche Emotionen verbinden Sie mit dem Thema Hochwasserschutz und -vorsorge? \*  
(Mehrfachauswahl möglich)

- Angst und Besorgnis
- Erleichterung
- Vertrauen und Sicherheit
- Empathie und Mitgefühl
- Frustration und Ärger
- Hoffnung
- Stolz
- Trauer und Verlust
- Motivation und Engagement
- Wut und Enttäuschung
- Sonstiges: \_\_\_\_\_

Was sind die Gründe und Auslöser dieser Emotionen bei Ihnen? (optional)

Da viele Dinge durch frühere Investitionen verhindert werden konnten

Wie hoch schätzen Sie das Risiko ein, dass bei einem Starkregenereignis der Abfluss des \*  
Wassers durch einen Missstand (bspw. Versperrungen) auf Ihrem eigenen Grundstück  
behindert wird?

1    2    3    4    5    6    7    8    9    10

sehr niedrig                                            sehr hoch

**Erwartungen**

Was erwarten Sie von einer Citizen Science App zur Hochwasservorsorge?  
(Mehrfachauswahl möglich) \*

- Mehr Wissen über Hochwasservorsorge
- Möglichkeit zur aktiven Beteiligung
- Verbesserung der lokalen Hochwasservorsorge
- Vernetzung mit anderen Bürgern und Experten
- Sonstiges: \_\_\_\_\_

Dieser Inhalt wurde nicht von Google erstellt und wird von Google auch nicht unterstützt.

Google Formulare

# Nachgangs-Fragebogen zur "Urban Flood Resilience - Smart Tools" Citizen Science App

Vielen

Dank, dass Sie die "Urban Flood Resilience - Smart Tools" (FloReST) App genutzt haben. Ihre Rückmeldung ist für uns sehr wertvoll.

Diese

Umfrage dauert etwa 5-10 Minuten und soll helfen, die App weiter zu verbessern und die Wirksamkeit des Projekts zu evaluieren.

Ihre

Antworten werden vertraulich behandelt und anonym ausgewertet. Bitte geben Sie zur Zuordnung dieser Nachgangs-Umfrage das gleiche Kürzel wie bei der Eingangs-Umfrage an.

Generierung des Kürzels:

Letzter Buchstabe Ihres Vornamens (z.B. "A" für Lisa)

Erste Ziffer Ihres Geburtsmonats (z.B. "2" für Februar)

Erster Buchstabe des Vornamens Ihrer Mutter (z.B. "B" für Bettina)

Letzter Buchstabe Ihres Geburtsortes (z.B. "R" für Trier)

--> "A2BR"

zusätzlich für Projektmitglieder:

Ergänzung um "- P"

--> "A2BR - P"

Kürzel \*

X4PH

**Erfahrungen mit der App**

Wie intuitiv war die Bedienung der App? \*

1 2 3 4 5 6 7 8 9 10

nicht intuitiv           sehr intuitiv

Welche Änderungen wünschen Sie sich, um die Bedienbarkeit der App intuitiver und einfacher zu gestalten? \*

Einfacher Designen

Welche der drei zur Verfügung gestellten Karten würden Sie gerne als Standardkarte nutzen? \*

- Straßenkarte
- Topographische Karte
- Luftbild-Karte

Denken Sie, dass durch die App Maßnahmen des Hochwasserschutzes besser an die tatsächlichen Gegebenheiten vor Ort angepasst werden können? \*

- Ja, deutlich besser
- Ja, etwas besser
- Nein

Sind Ihnen alle in der App verwendeten Begriffe und Bezeichnungen geläufig gewesen? \*

Ja

Nein

Falls Nein, welche und warum nicht?

---

Sind alle Symbole/Icons selbsterklärend und verbessern die Verständlichkeit? \*

Ja

Nein

Falls Nein, welche und warum nicht?

---

Welche Verbesserungen und zusätzlichen Funktionen der App würden Sie vorschlagen? \*

Mehr Zoom bei den Karten

---

Würden Sie die App auch im Alltag nutzen? \*

Ja

Nein



Welche Emotionen verbinden Sie nach der App-Journey mit dem Thema Hochwasserschutz und -vorsorge? (Mehrfachauswahl möglich) \*

- Angst und Besorgnis
- Erleichterung
- Vertrauen und Sicherheit
- Empathie und Mitgefühl
- Frustration und Ärger
- Hoffnung
- Stolz
- Trauer und Verlust
- Motivation und Engagement
- Wut und Enttäuschung
- Sonstiges: .....

Möchten Sie weitere Kommentare oder Anregungen teilen? (optional)

.....

Dieser Inhalt wurde nicht von Google erstellt und wird von Google auch nicht unterstützt.

Google Formulare

# Initial questionnaire for the "Urban Flood Resilience - Smart Tools" citizen science app

Welcome to the App Journey survey as part of the "Urban Flood Resilience - Smart Tools" (FloReST) research project. This survey helps us to understand your current level of knowledge on the topic of heavy rain and flood management and your expectations so that we can optimise the app in the best possible way.

In order to match your responses from the initial survey (before the app journey) to the follow-up survey (after the app journey), we ask you to generate an individual code.

Your answers will be treated confidentially and evaluated anonymously. The survey takes about 5-10 minutes.

Thank you for participating! Generating

the code:

Last letter of your first name (e.g. "A" for Lisa)

First digit of your birth month (e.g. "2" for February)

First letter of your mother's first name (e.g. "B" for Bettina) Last

letter of your place of birth (e.g. "R" for Trier)

--> "A2BR"

Additionally for project members: Add "-

P"

--> "A2BR - P"

Abbreviation \*

X4PH

**Demographic characteristics**

Age \*

 Dropdown

21

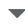

Gender \*

 Dropdown

Male

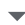

Living situation \*

Rented

Condominium

Homeowner

Other:

.....

Place of residence (postcode) \*

55768

.....

Educational background \*

- No school leaving certificate
- Vocational qualification (secondary school leaving certificate)
- Intermediate school leaving certificate (secondary school leaving certificate)
- Technical college entrance qualification/university entrance qualification
- Completed vocational training
- Diploma
- Bachelor's degree
- Master's degree
- Doctorate State
- State examination
- Other: .....

Are you active in an association or organisation involved in environmental protection or disaster control? \*

- Yes
- No

**Current level of knowledge**

Have you had any experience with flooding in the past? \*

- Yes, personally affected
- Yes, affected nearby
- No

How do you find out about local weather conditions and heavy rain risks?(Multiple selections possible) \*

- Apps (e.g. weather, disaster control, newspaper)
- Television
- Radio
- Print media
- Internet websites
- Not at all
- Other: .....

What emotions do you associate with the topic of flood protection and prevention? \*

(Multiple selections possible)

- Fear and anxiety
- Relief
- Trust and security
- Empathy and compassion
- Frustration and anger
- Hope
- Pride
- Grief and loss
- Motivation and commitment
- Anger and disappointment
- Other \_\_\_\_\_

What are the reasons and triggers for these emotions in you? (optional)

Since many things could have been prevented by earlier investments \_\_\_\_\_

How high do you estimate the risk that heavy rainfall will prevent water from draining away from your own property due to a problem (e.g. blockages)?

water being impeded by a problem (e.g. blockages) on your own property during heavy rainfall?

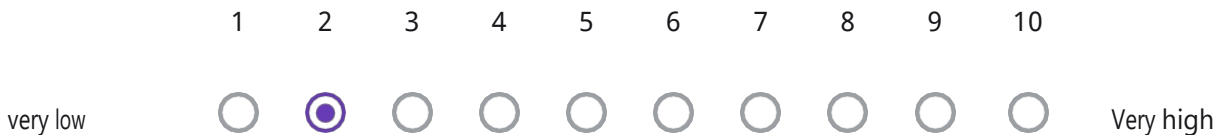

**Expectations**

What do you expect from a citizen science app for flood prevention?(Multiple selections possible) \*

More knowledge about flood prevention

Opportunity for active participation

Improvement of local flood prevention

Networking with other citizens and experts

Other: .....

This content was not created by Google and is not supported by Google.

Google Forms

# Follow-up questionnaire on the "Urban Flood Resilience – Smart Tools" citizen science app

Many

Thank you for using the Urban Flood Resilience - Smart Tools (FloReST) app. Your feedback is very valuable to us.

This

survey takes about 5-10 minutes to complete and will help us to further improve the app and evaluate the effectiveness of the project.

Your

answers will be treated confidentially and evaluated anonymously. Please use the same code as in the initial survey to assign this follow-up survey.

Generating the code:

Last letter of your first name (e.g. "A" for Alice) First

digit of your birth month (e.g. "2" for February)

First letter of your mother's first name (e.g. "B" for Bettina) Last

letter of your place of birth (e.g. "R" for Trier)

--> "A2BR"

Additionally for project members: Add "-

P"

--> "A2BR - P"

Abbreviation \*

X4PH

---

**Experience with the app**

How intuitive was the app to use? \*

1 2 3 4 5 6 7 8 9 10

Not intuitive           Very intuitive

What changes would you like to see to make the app more intuitive and easier to use? \*

Simpler design

Which of the three maps provided would you like to use as the default map? \*

- Road map
- Topographical map
- Aerial map

Do you think that the app will make it easier to adapt flood protection measures to actual conditions on site? \*

- Yes, significantly better
- Yes, somewhat better
- No

Were you familiar with all the terms and names used in the app? \*

Yes

No

If no, which ones and why not?

---

Are all symbols/icons self-explanatory and do they improve comprehensibility? \*

Yes

No

If no, which ones and why not?

---

What improvements and additional features would you suggest for the app? \*

More zoom on the maps

---

Would you use the app in your everyday life? \*

Yes

No



After completing the app journey, what emotions do you associate with the topic of flood protection and prevention? (Multiple selections possible)

\*

- Fear and concern
- Relief
- Trust and security
- Empathy and compassion
- Frustration and anger
- Hope
- Pride
- Sadness and loss
- Motivation and commitment
- Anger and disappointment
- Other: \_\_\_\_\_

Would you like to share any further comments or suggestions? (optional)

\_\_\_\_\_

This content was not created by Google and is not endorsed by Google.

Google forms
